# Supplementary material
Source: Research Square preprint supplement (doi:10.21203/rs.3.rs-9328347/v1)
Supplement: Supplementary file 1 [file ad10d3e1d3ac4710f6a48a02.docx]

**Table 1. Histopathological and Immunohistochemical Findings in Control and Irradiated Groups**

| **Variable** | **Control Group (Median, min-max)** | **Irradiated Group (Median, min-max)** | **p-value (Mann-Whitney U)** |
| --- | --- | --- | --- |
| Congestion | 1 (0-1) | 1.5 (1-2) | 0.031 |
| Inflammation | 0 (0-0) | 1 (0-2) | 0.040 |
| Epithelial desquamation | 0 (0-0) | 1.5 (1-2) | 0.006 |
| HSP-90 (thyroid) | 2 (2-3) | 1 (1-2) | 0.011 |
| HSP-90 (parathyroid) | 2.5 (2-3) | 2.5 (1-3) | 0.914 |
